# Supplementary material for: Skin Sea Surface Temperature schemes in coupled ocean-atmosphere modeling: the impact of chlorophyll-interactive e-folding depth
Source: Copernicus journal article supplement (doi:10.5194/gmd-2024-13), 2024-01-30
Supplement: Supplementary file 1 [file gmd-2024-13-supplement.pdf]

## Supplementary materials

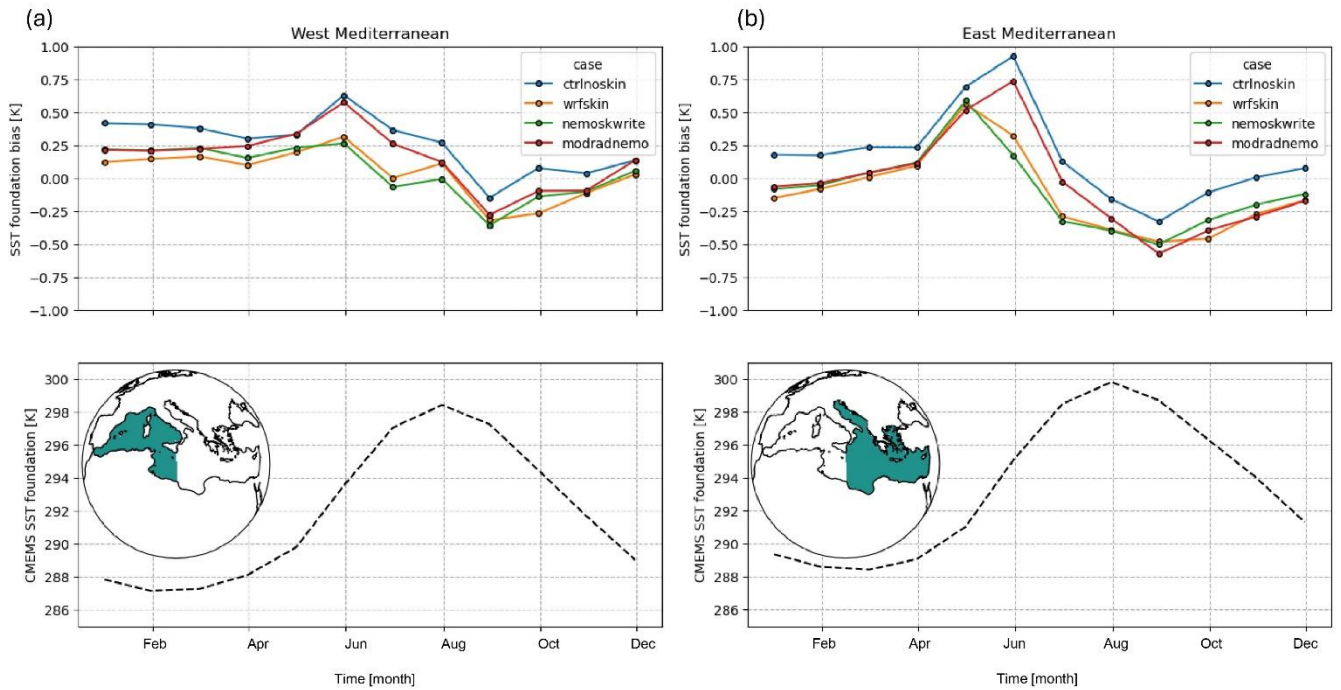

**Figure S1.** Basic validation of foundation SST averaged over the Western and Eastern Mediterranean Sea, respectively on left and right panels. Upper panels show the bias with respect to CMEMS monthly averaged foundation SST, while lower panels show the reference CMEMS absolute values.

| Month  | Jan   | Feb   | Mar   | Apr    | May   | Jun   | Jul   | Aug   | Sep   | Oct   | Nov   | Dec   |
|--------|-------|-------|-------|--------|-------|-------|-------|-------|-------|-------|-------|-------|
| allday | 35534 | 32528 | 39890 | 222996 | 32781 | 26298 | 21505 | 24353 | 20990 | 23537 | 37768 | 37739 |
| h00:00 | 1486  | 1370  | 1676  | 9480   | 1469  | 1201  | 949   | 1060  | 899   | 986   | 1581  | 1599  |
| h01:00 | 1494  | 1364  | 1672  | 9829   | 1481  | 1217  | 982   | 1071  | 891   | 982   | 1567  | 1596  |
| h02:00 | 1480  | 1355  | 1669  | 9578   | 1478  | 1226  | 953   | 1068  | 887   | 966   | 1561  | 1574  |
| h03:00 | 1491  | 1353  | 1675  | 9785   | 1475  | 1222  | 962   | 1069  | 900   | 984   | 1583  | 1558  |
| h04:00 | 1489  | 1364  | 1671  | 9730   | 1475  | 1173  | 954   | 1073  | 900   | 988   | 1589  | 1562  |
| h05:00 | 1486  | 1349  | 1663  | 9574   | 1448  | 1227  | 959   | 1065  | 897   | 995   | 1573  | 1555  |
| h06:00 | 1487  | 1370  | 1658  | 9636   | 1465  | 1221  | 943   | 1065  | 899   | 993   | 1588  | 1560  |
| h07:00 | 1484  | 1366  | 1667  | 10043  | 1457  | 1203  | 978   | 1069  | 896   | 1009  | 1585  | 1574  |
| h08:00 | 1471  | 1362  | 1660  | 10195  | 1412  | 1177  | 967   | 1081  | 900   | 1010  | 1596  | 1572  |
| h09:00 | 1474  | 1364  | 1645  | 10361  | 1399  | 1132  | 942   | 1058  | 897   | 1008  | 1600  | 1572  |
| h10:00 | 1482  | 1368  | 1653  | 9940   | 1345  | 1046  | 875   | 1023  | 806   | 870   | 1398  | 1570  |
| h11:00 | 1469  | 1350  | 1638  | 9298   | 1244  | 965   | 817   | 903   | 767   | 903   | 1518  | 1496  |
| h12:00 | 1476  | 1335  | 1605  | 9186   | 1229  | 935   | 779   | 904   | 834   | 976   | 1578  | 1585  |
| h13:00 | 1485  | 1332  | 1631  | 8649   | 1197  | 944   | 784   | 901   | 835   | 975   | 1587  | 1592  |
| h14:00 | 1476  | 1335  | 1630  | 8325   | 1205  | 919   | 780   | 905   | 842   | 978   | 1588  | 1585  |
| h15:00 | 1466  | 1348  | 1642  | 8303   | 1194  | 927   | 793   | 910   | 859   | 978   | 1587  | 1593  |
| h16:00 | 1481  | 1340  | 1630  | 8236   | 1223  | 955   | 800   | 939   | 874   | 986   | 1583  | 1577  |
| h17:00 | 1474  | 1364  | 1644  | 8199   | 1258  | 1002  | 831   | 988   | 884   | 996   | 1587  | 1583  |
| h18:00 | 1486  | 1358  | 1658  | 8298   | 1323  | 1032  | 859   | 997   | 890   | 985   | 1594  | 1577  |
| h19:00 | 1475  | 1353  | 1662  | 8456   | 1342  | 1080  | 888   | 1020  | 891   | 997   | 1586  | 1575  |
| h20:00 | 1474  | 1343  | 1651  | 8855   | 1398  | 1097  | 920   | 1031  | 887   | 988   | 1588  | 1570  |
| h21:00 | 1479  | 1357  | 1715  | 9585   | 1395  | 1122  | 916   | 1053  | 886   | 1002  | 1582  | 1575  |
| h22:00 | 1491  | 1367  | 1762  | 9805   | 1424  | 1115  | 925   | 1054  | 877   | 989   | 1590  | 1572  |
| h23:00 | 1478  | 1361  | 1713  | 9650   | 1445  | 1160  | 949   | 1046  | 892   | 993   | 1579  | 1567  |

Table S1: Table resuming the number of Drifter's observations in each month, for each hour of the day in that given month: the greatest number of measurements in total is April, with a peak of 10361 measurements at 9:00 am.

## Details on cool skin depth and solar fraction in the warm layer

The parameters used follow the choices in Fairall et al. (1996), with

$$f_s = 0.065 + 11\delta - \frac{6.6 \times 10^{-5}}{\delta} \left[ 1 - e^{-\frac{\delta}{8 \times 10^{-4}}} \right]$$

with

$$\delta = 6 \left[ 1 + \left( \frac{-16g\alpha_w \nu_w^3}{u_{*w}^4 k_w^2 \rho_w c_w} (Q + R_s f_s) \right)^{3/4} \right]^{-1/3}$$

The equation for the prognostic variable  $\Delta T_w$  is solved, after being discretized in time, as follows:

$$\Delta T_w^{(n+1)} = \left[ \Delta T_w^{(n)} + \frac{Q + R_s f_s}{d\rho_w c_w} \frac{\nu + 1}{\nu} \Delta t \right] / \left[ 1 + \Delta t \frac{(\nu + 1)k u_{*w}}{d\phi_t (d/L)} \right], \quad (12)$$

where  $\Delta T_w^{(n)}$  is the difference ( $T_{-\delta} = T_{-d}$ ) at time  $t_n = n\Delta t$ . The warm layer reference depth  $d$  is an important parameter in this scheme, since it's very closely linked to solar radiation extinction, which is the main responsible for the diurnal warming. Its redefinition is the starting point of our modification to the existing schemes, as we discussed in the main text.
